# Supplementary material for: Downregulation of SFRP2 facilitates cancer stemness and radioresistance of glioma cells via activating Wnt/β-catenin signaling
Source: PubMed Central journal article supplement (PMC8635357; doi:10.1371/journal.pone.0260864), 2021-12-01

Figure 2J

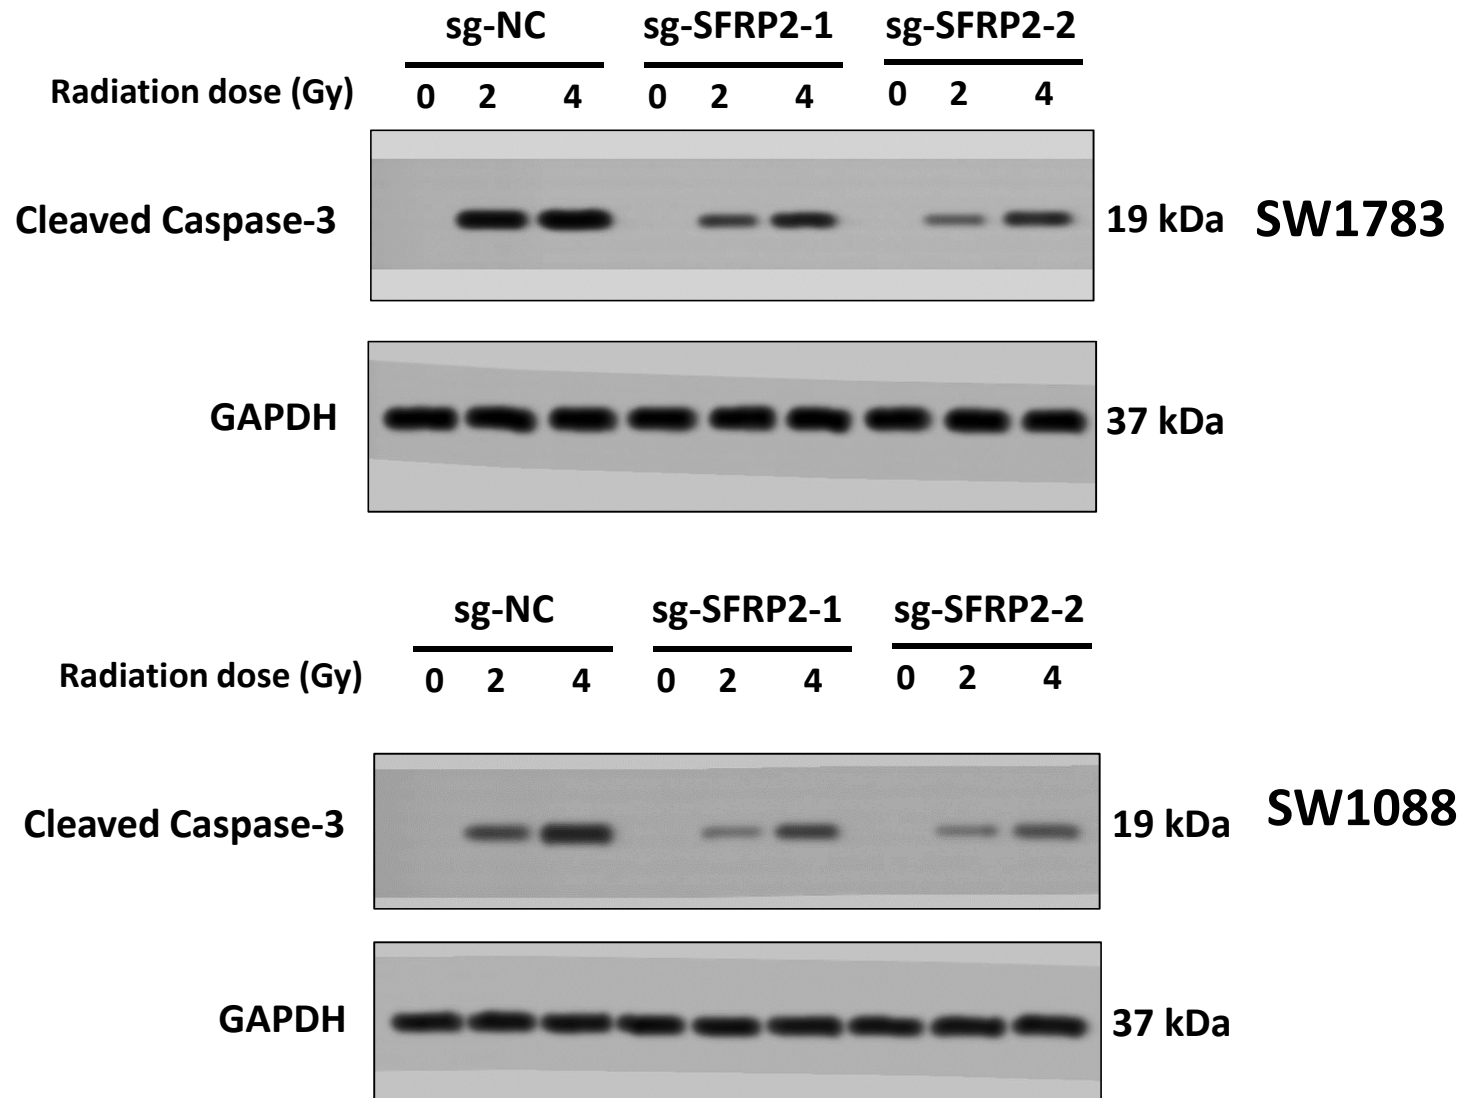

Figure 3A

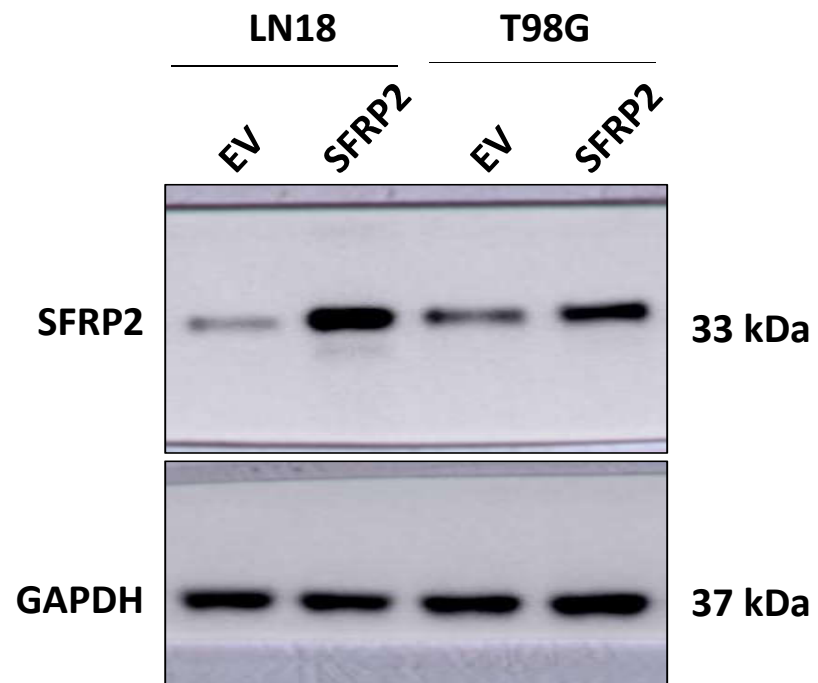

**Figure 3J**

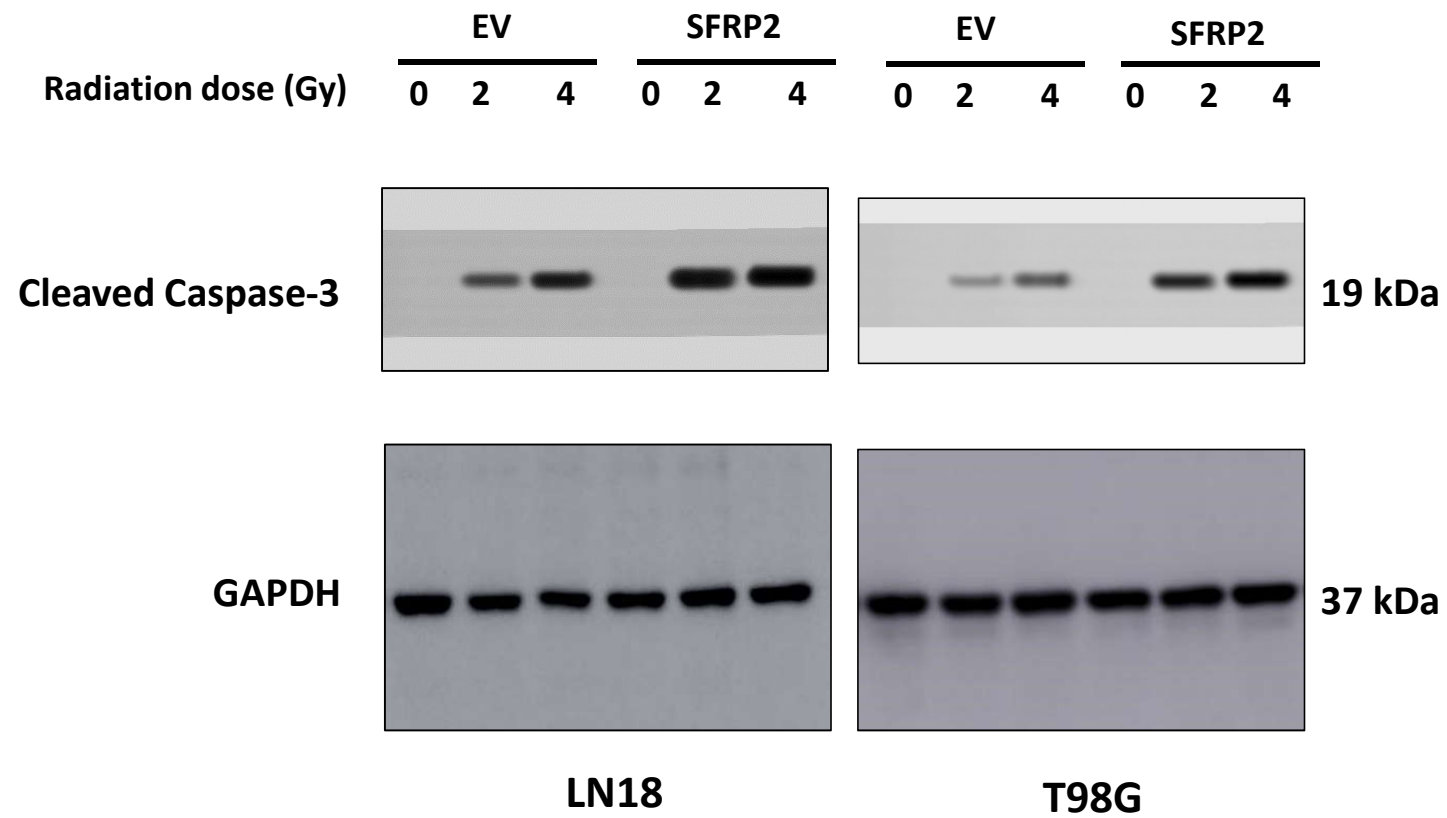





Figure 5C

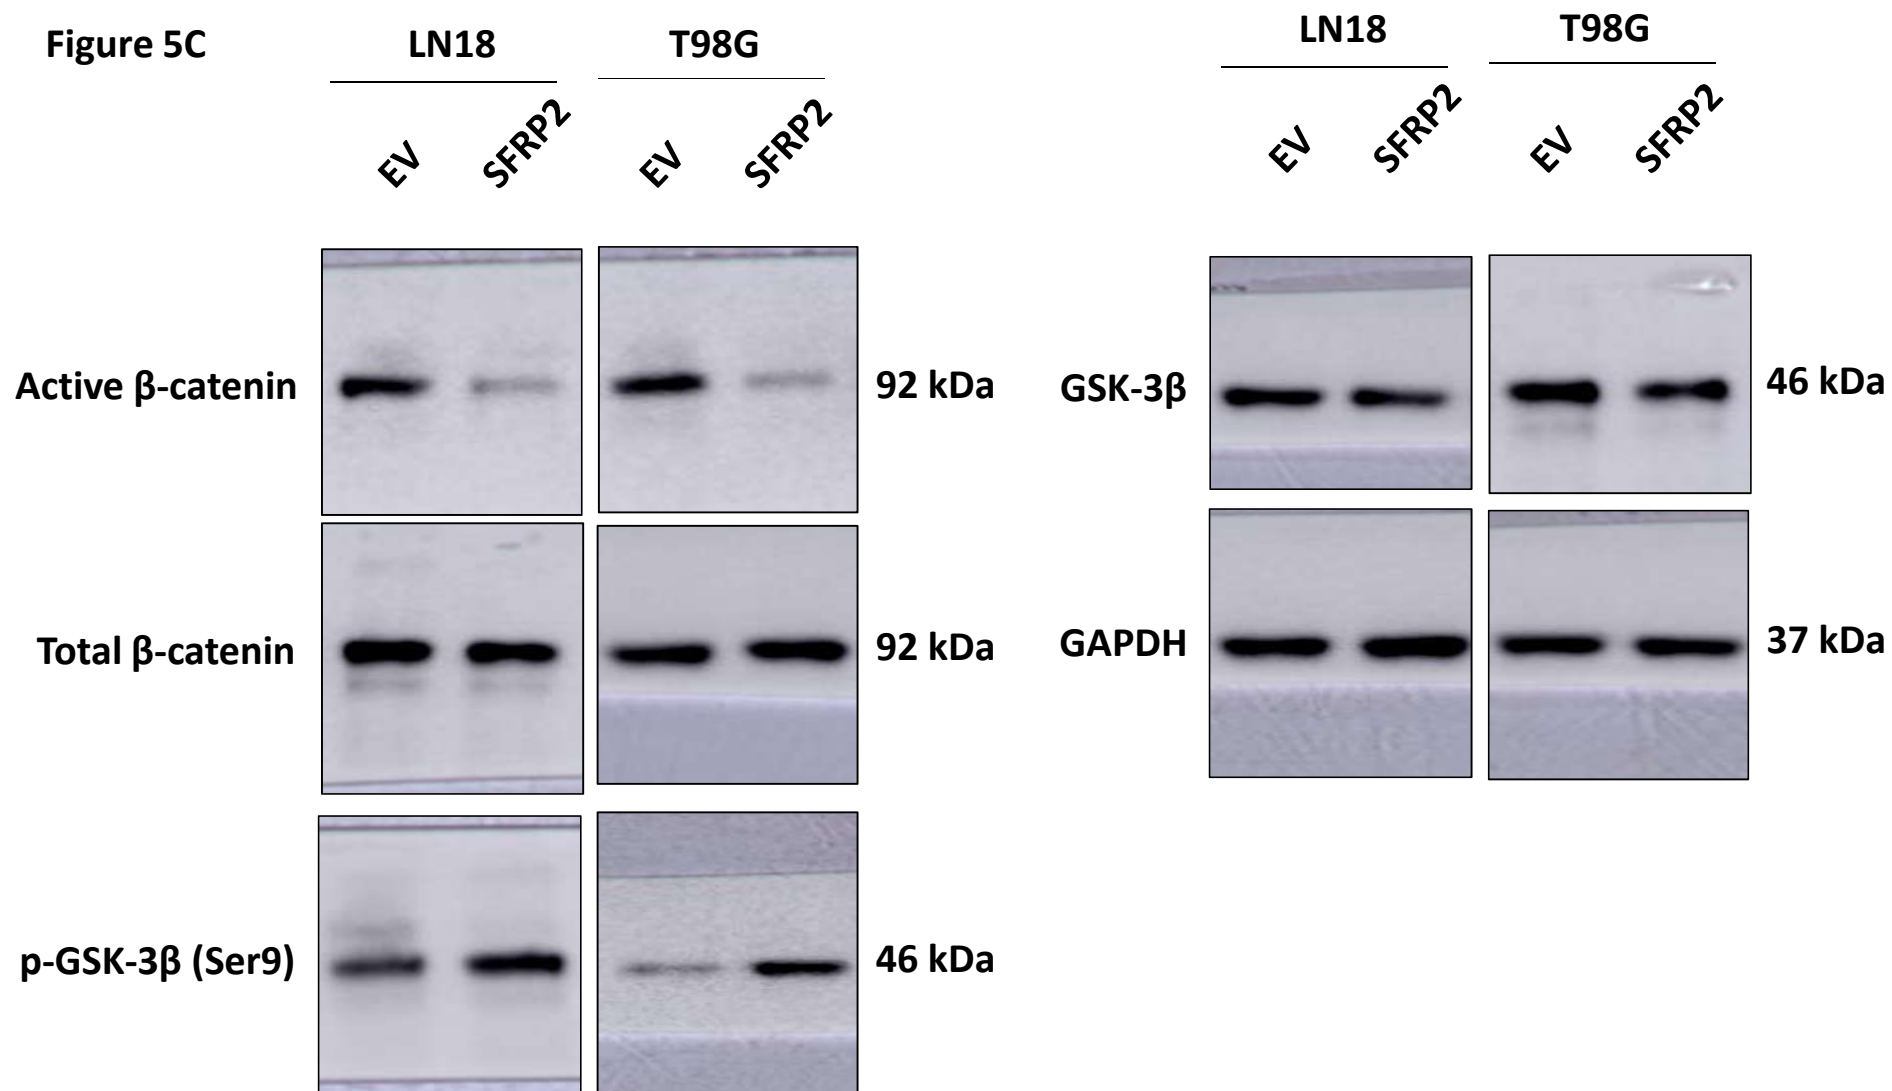

Supplement: pone.0260864.s004.pdf [file pone.0260864.s004.pdf]
